# Supplementary material for: A stable high internal phase emulsion fabricated with OSA-modified starch: an improvement in β-carotene stability and bioaccessibility
Source: Royal Society of Chemistry journal article supplement (doi:10.1039/c9fo00508k), 2019-01-01

## Figure Captions

Figure S1. Interfacial tension of HIPEs stabilized by OSA-modified starch (5 wt%) at different pH conditions.

Figure S2. Interfacial tension of HIPEs stabilized by OSA-modified starch (5 wt%) at varying ionic values of 0-400 mM.

Figure S3. Rheological properties of OSA-starch solution at different concentration (2 wt%-10 wt%) (a) and different pH (2.0-7.0) (b).

Figure S4. Average particle size of oil droplets before simulated in vitro small intestine digestion.

Figure S1

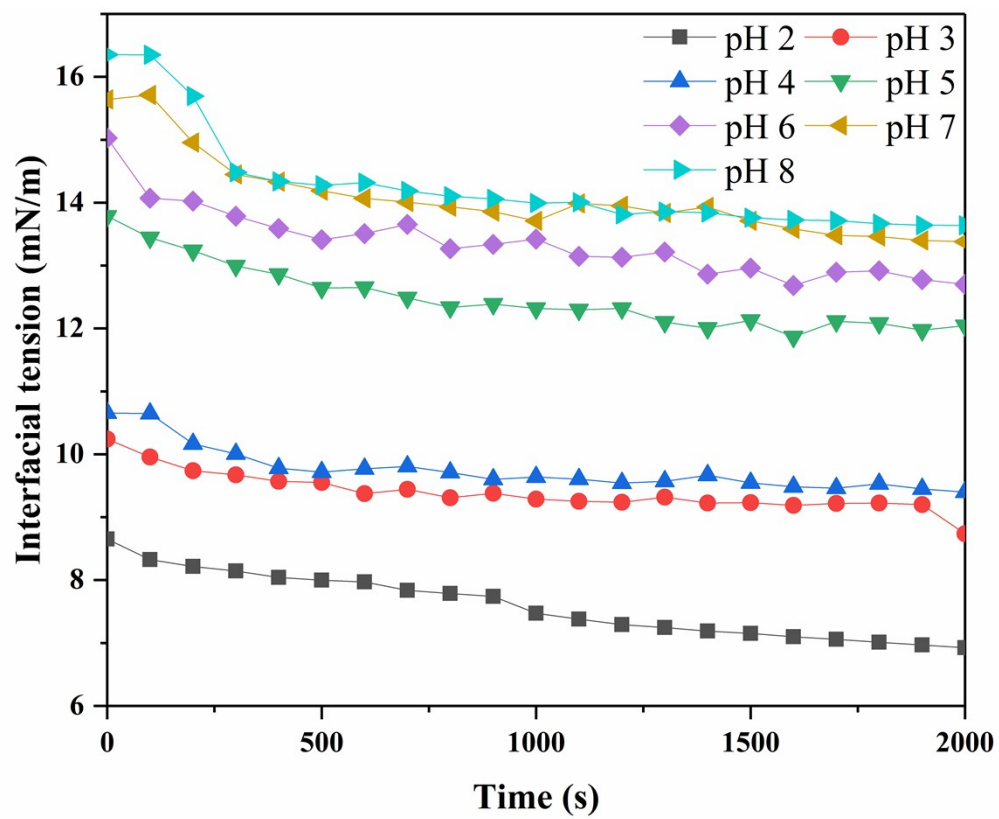

Figure S2

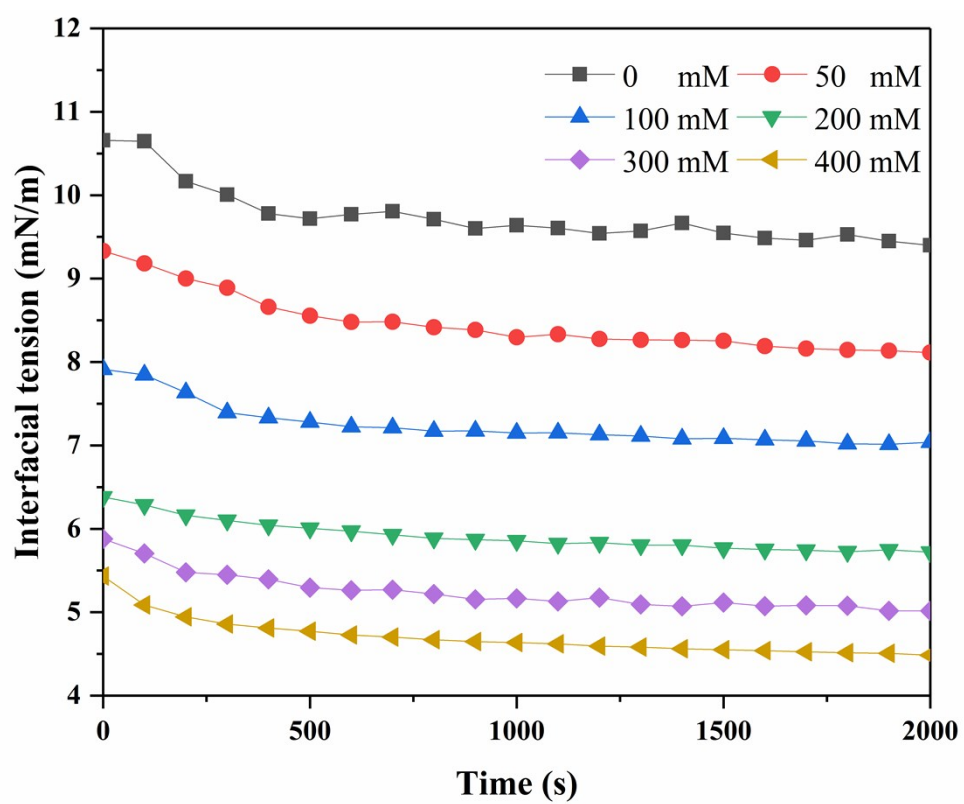

Figure S3

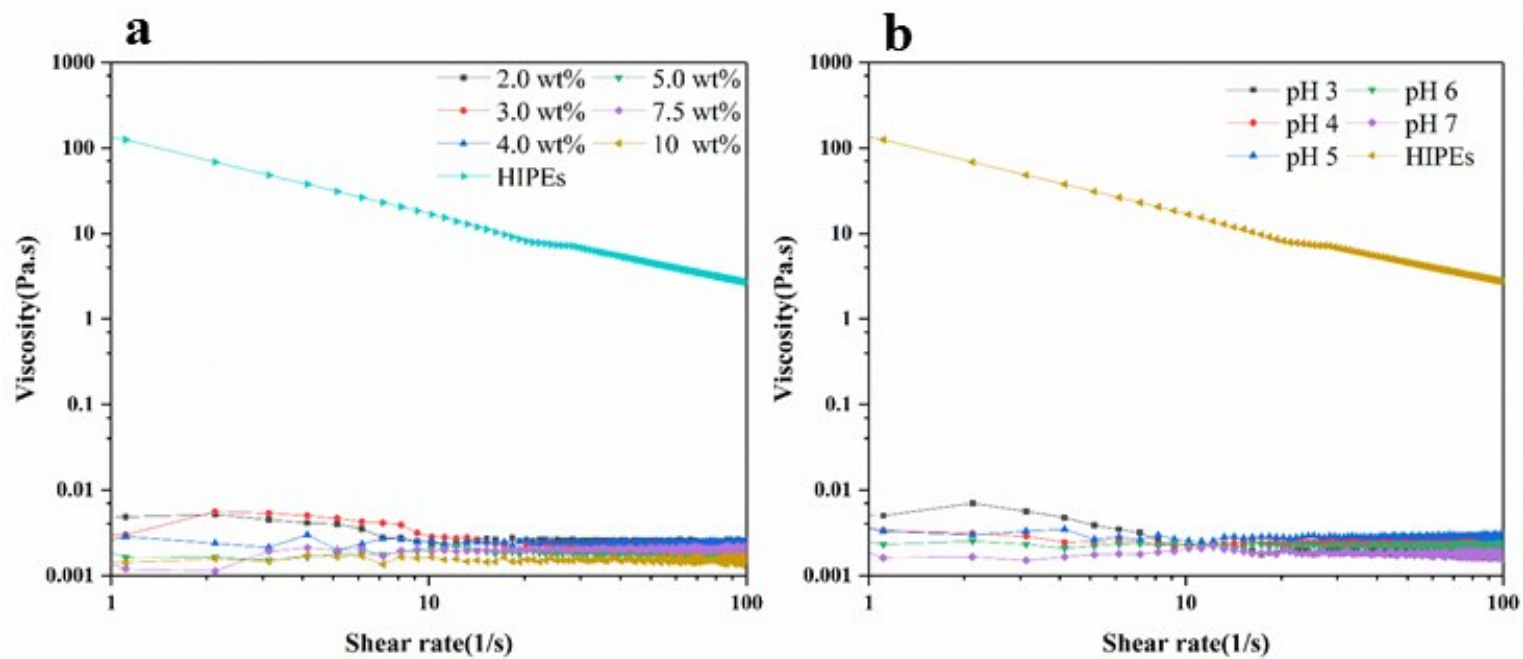

Figure S4

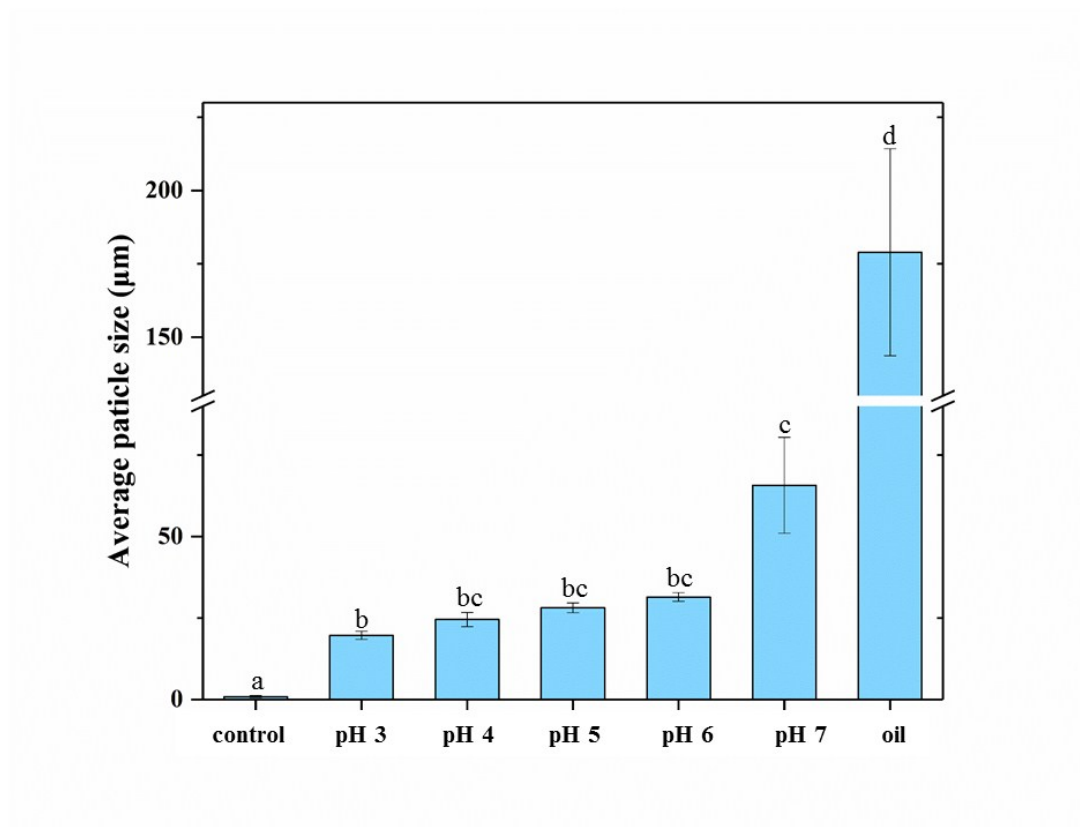

Supplement: c9fo00508k1.pdf [file c9fo00508k1.pdf]
